# Supplementary material
Source: PubMed Central journal article supplement (PMC4311831)
Supplement: pnas.201424028SI.pdf [file pnas.201424028SI.pdf]

# Supporting Information

Hah et al. 10.1073/pnas.1424028112

## SI Materials and Methods

**Cell Culture and Treatments.** The primary macrophages were pre-treated with JQ1 (500 nM) or vehicle (DMSO) for 1 h before treatment with 100 ng/mL of LPS (Sigma-Aldrich) for 1 h.

**Quantitative RT-PCR.** Total RNA was isolated using TRIzol according to the manufacturer's instructions (Invitrogen) and reverse-transcribed to cDNA using iScript reagent (Bio-Rad). Quantitative RT-PCR was performed using SsoAdvanced SYBR Green reagent on the CFX384 system (BioRad).

**Quantitative RT-PCR Primer Sequences.** The following primer sequences were used: Ccl5-gene, forward 5'-ACCACTCCCTGCTGCTTT-3', reverse 5'-AGCACTTGCTGCTGGTGT-3';

Ccl5-seRNA1, forward 5'-GGAAGTGTGCTTGGGTCA-3', reverse 5'-CTCACACTCGCACACCT-3'; Ccl5-seRNA2, forward 5'-AAGCCAGGACAGGACAGG-3', reverse 5'-TTTGGTGCGCTTCTGAGT-3'; Ccl5-seRNA3, forward 5'-GGCCATCACTTGGATTT-3', reverse 5'-TCTCGTGTGTCATGTG-3'; Ccl5-seRNA4, forward 5'-TACCCTCAATGGCAGCTTTA-3', reverse 5'-TTGAGAGCTTGTGGGGTAA-3'; Ccl5-seRNA5, forward 5'-GCACCCTCTAAACCTGACCT-3', reverse 5'-TGCTGGTCTTCAGCACACTA-3'; Irf1-gene, forward 5'-CCCTCTGTCTTTCCCTCCAG-3', reverse 5'-CTCTAGCCAGGTCTCATCC-3'; and Irf1-seRNA, forward 5'-CAGCTATCCCAGGTGATTGA-3', reverse 5'-CCAAGAGGCAGAGCATTTT-3'.

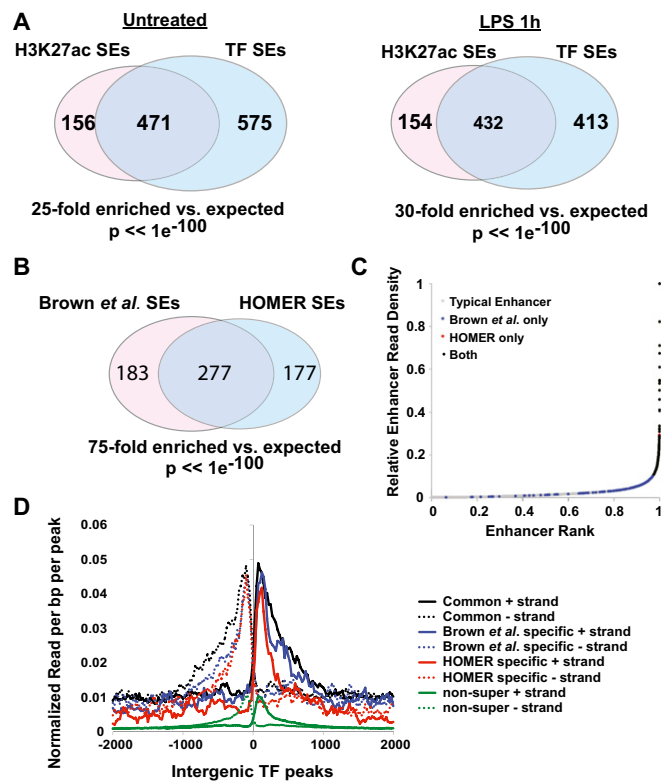

**Fig. S1.** Comparison of SE callings. (A) Venn diagram representations of SE comparisons between SEs that are called using H3K27Ac ChIP-Seq data and those that are called using key macrophage TFs used in this study in both vehicle and LPS treatment conditions. (B and C) Comparison between SEs found in Brown et al. (1) and SEs found using HOMER in the same mouse macrophage H4K12ac ChIP-Seq dataset. (D) Assessment of the functional quality of differential SE call by measuring the eRNA production from intergenic TFBSs that were specific to Brown et al. or HOMER SEs.

1. Brown JD, et al. (2014) NF- $\kappa$ B directs dynamic super enhancer formation in inflammation and atherogenesis. *Mol Cell* 56(2):219-231.





**Table S1. The number of eRNAs near ( $\pm 50$  kb from TSS) a gene and the presence of an SE**

| No. of eRNAs | Total no. of genes | No. of genes without SEs | No. of genes with SEs | Fraction of genes with SEs |
|--------------|--------------------|--------------------------|-----------------------|----------------------------|
| 0            | 22,489             | 21,342                   | 1,147                 | 0.051                      |
| 1            | 4,338              | 3,804                    | 534                   | 0.123                      |
| 2 and 3      | 4,041              | 3,164                    | 877                   | 0.217                      |
| 4 and 6      | 1,373              | 870                      | 503                   | 0.366                      |
| >7           | 172                | 68                       | 104                   | 0.604                      |

## Other Supporting Information Files

[Dataset S1 \(XLSX\)](#)
